# Supplementary material
Source: PubMed Central journal article supplement (PMC5730044)
Supplement: NIHMS69161-supplement-Supplementary_information.pdf [file NIHMS69161-supplement-Supplementary_information.pdf]

1 **Supplementary**

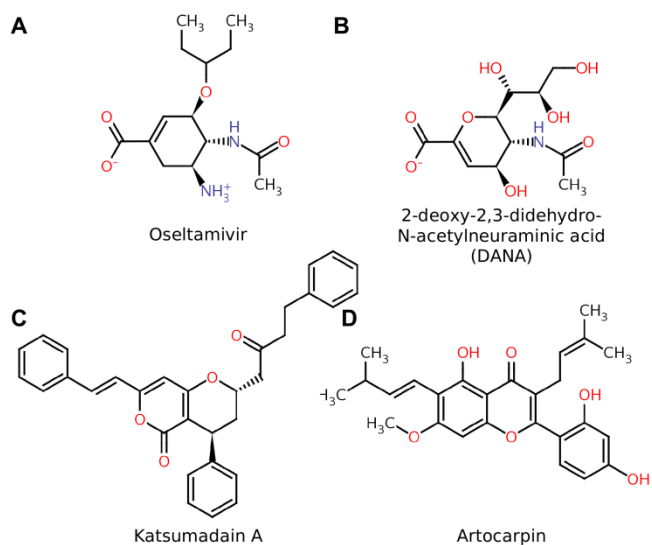

2

3 **Figure S1.** Structure of the NAIs. Names and abbreviations as used in this study. Protonation

4 state of the molecules corresponds to the major species at pH 7.

5

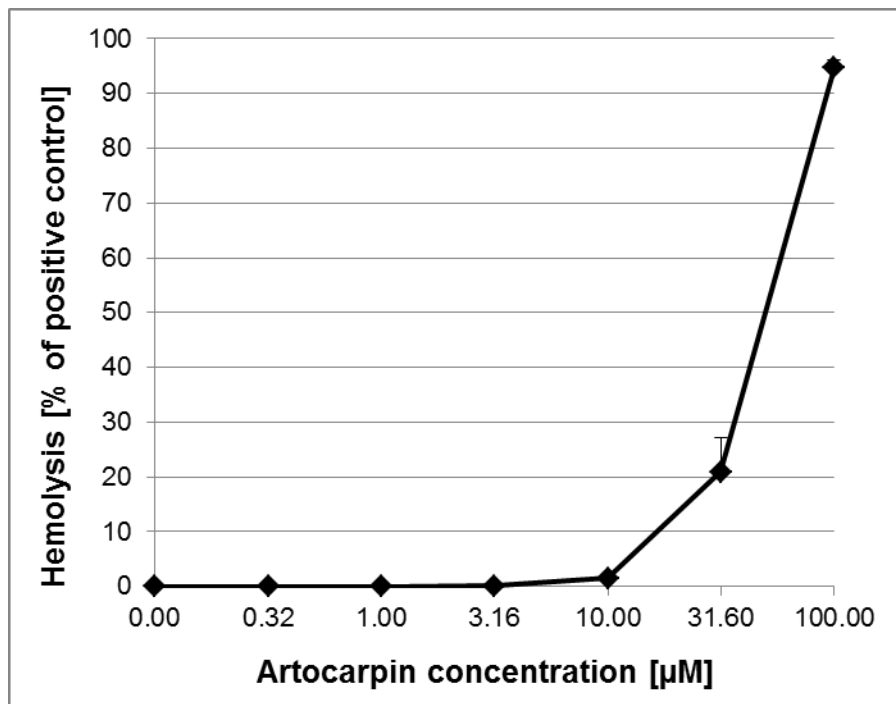

6  
7 **Figure S2.** Relative rate of hemolysis in human erythrocytes is shown upon incubation with  
8 different concentrations of artocarpin. The presence of hemoglobin in the supernatant (red) was  
9 measured at 577 nm with the reference wavelength at 655 nm. Erythrocytes diluted in PBS or in  
10 aqua bidest were used as negative or positive control, respectively. Data were mean  $\pm$  SD (n = 3).

11

12

13 **Table S1.** PCR primers used in this study

| <b>Primer</b> | <b>Sequence (5' to 3')</b>  | <b>Binding site (bp) <sup>a</sup></b> |
|---------------|-----------------------------|---------------------------------------|
| F1f           | GTCATTTAAATGAACTGTAGTAAAAG  | -67-(-41)                             |
| F1r           | CCAGATTTTCAGACTTGTTTCGAG    | 743-764                               |
| F2f           | GCACCCTTAAAAGTTAAACCAGGTC   | 631-655                               |
| F2r           | GGTTTAAACAGGATCTACAACAACG   | 1476-1499                             |
| F3f           | GCTTATAACCATTTCGAGAAAATGG   | 1414-1436                             |
| F3r           | CTCACCATTTTCTTCGACACGTG     | 2186-2208                             |
| F4f           | CACAGGTAAAGATGTCTATGTTC     | 2066-2089                             |
| F4r           | AGACCTCTTATGATTTTCGTATCAGC  | 87-111                                |
| F1iF          | CCAAGAGATTACTATGCACGAGATTTG | 319-345                               |
| F2iF          | GATTCGGAATCTCACTGTGTATAATC  | 855-880                               |
| F3iR          | CGAAGTACAATTCCTGTTCCAGGAC   | 1706-1730                             |
| F4iR          | CGATTTTCATGAACAGCTGGCTCTG   | 2900-2923                             |

14  
 15 <sup>a</sup> Position within R36A (ancestral strain D39) *nanA* sequence (accession number X72967).

16

17

18 **Table S2.** Mean 50% inhibitory concentration and standard deviation of oseltamivir, DANA,  
 19 artocarpin, and katsumadain A, measured against the precipitated pneumococcal protein in the  
 20 FL-based assay

| <b>Strains</b>   | <b>FL inhibition assay IC<sub>50</sub> (μM) <sup>a</sup></b> |              |                      |                   |
|------------------|--------------------------------------------------------------|--------------|----------------------|-------------------|
|                  | <b>oseltamivir</b>                                           | <b>DANA</b>  | <b>katsumadain A</b> | <b>artocarpin</b> |
| DSM20566         | 0.91 ± 0.14                                                  | 10.62 ± 0.85 | 15.24 ± 2.99         | 8.43 ± 4.08       |
| recombinant NanA | 2.85 ± 0.89                                                  | 18.03 ± 1.87 | 36.79 ± 24.16        | 9.96 ± 5.79       |
| D39              | 2.89 ± 0.09                                                  | 13.79 ± 1.82 | 17.28 ± 3.57         | 6.06 ± 0.77       |
| DSM14378         | 0.98 ± 0.22                                                  | 12.17 ± 2.65 | 45.57 ± 7.14         | 9.74 ± 2.58       |
| CJ9400           | 0.40 ± 0.09                                                  | 19.23 ± 4.01 | 81.03 ± 14.69        | 44.83 ± 12.34     |
| CF6937           | 1.43 ± 0.26                                                  | 16.42 ± 2.39 | 13.93 ± 0.93         | 3.83 ± 2.13       |
| BC7326           | 1.14 ± 0.54                                                  | 9.92 ± 1.37  | 32.57 ± 17.08        | 11.71 ± 5.66      |
| CF8919           | 2.33 ± 1.38                                                  | 12.38 ± 2.96 | 5.79 ± 0.70          | 7.52 ± 3.11       |
| PN8828           | 0.62 ± 0.06                                                  | 15.44 ± 9.06 | 33.97 ± 6.60         | 36.08 ± 21.11     |
| BC57             | 2.85 ± 1.16                                                  | 12.41 ± 0.52 | 4.50 ± 1.58          | 5.48 ± 1.71       |

21  
 22 <sup>a</sup> IC<sub>50</sub> values and their standard deviations were calculated for a minimum of three independent  
 23 tests.

24

25 **Table S3.** Mean 50% inhibitory concentration and standard deviation of oseltamivir, DANA,  
 26 artocarpin, and katsumadain A, measured against the precipitated protein in the CL-based assay.

| <b>strains</b>   | <b>CL inhibition assay IC<sub>50</sub> (μM)<sup>a</sup></b> |             |                      |                   |
|------------------|-------------------------------------------------------------|-------------|----------------------|-------------------|
|                  | <b>oseltamivir</b>                                          | <b>DANA</b> | <b>katsumadain A</b> | <b>artocarpin</b> |
| DSM20566         | 0.73 ± 0.15                                                 | 2.43 ± 0.76 | 1.01 ± 0.37          | 0.33 ± 0.14       |
| recombinant NanA | 0.93 ± 0.42                                                 | 3.16 ± 0.87 | 0.52 ± 0.12          | 0.30 ± 0.09       |
| D39              | 0.85 ± 0.15                                                 | 3.61 ± 1.85 | 1.25 ± 0.44          | 0.32 ± 0.02       |
| DSM14378         | 0.35 ± 0.05                                                 | 1.93 ± 0.83 | 1.61 ± 1.06          | 0.43 ± 0.18       |
| CJ9400           | 0.24 ± 0.08                                                 | 4.27 ± 2.83 | 1.31 ± 0.26          | 0.33 ± 0.10       |
| CF6937           | 0.60 ± 0.13                                                 | 2.05 ± 0.18 | 1.18 ± 0.16          | 1.65 ± 0.11       |
| BC7326           | 0.33 ± 0.16                                                 | 1.03 ± 0.29 | 0.31 ± 0.06          | 0.11 ± 0.05       |
| CF8919           | 0.40 ± 0.10                                                 | 0.62 ± 0.14 | 0.65 ± 0.12          | 0.16 ± 0.03       |
| PN8828           | 0.25 ± 0.12                                                 | 1.68 ± 0.52 | 0.31 ± 0.06          | 0.77 ± 0.14       |
| BC57             | 0.88 ± 0.45                                                 | 1.88 ± 0.76 | 1.14 ± 0.19          | 0.33 ± 0.12       |

27  
 28 <sup>a</sup> The IC<sub>50</sub> values and standard deviations were calculated of at least three independent tests.  
 29

30

31 **Table S4.** Absolute numbers of adherent bacteria (CFU/well) in the adherence inhibition assay.

| <b>Adherence inhibition assay CFU/well <math>\times 10^6</math></b> |                                          |                   |                 |
|---------------------------------------------------------------------|------------------------------------------|-------------------|-----------------|
| <b>compound</b>                                                     | <b>conc. in <math>\mu\text{M}</math></b> | <b>DSM20566</b>   | <b>PN8828</b>   |
| no compound                                                         |                                          | 20.13 $\pm$ 13.51 | 0.07 $\pm$ 0.04 |
| oseltamivir                                                         | 50.00                                    | 16.04 $\pm$ 14.33 | not tested      |
|                                                                     | 25.00                                    | 17.71 $\pm$ 15.07 | not tested      |
| DANA                                                                | 50.00                                    | 12.96 $\pm$ 9.44  | not tested      |
|                                                                     | 25.00                                    | 16.58 $\pm$ 12.72 | not tested      |
| katsumadain A                                                       | 50.00                                    | 18.63 $\pm$ 17.58 | not tested      |
|                                                                     | 25.00                                    | 16.88 $\pm$ 13.71 | not tested      |
| artocarpin                                                          | 12.50                                    | 4.83 $\pm$ 2.72   | 0.02 $\pm$ 0.01 |
|                                                                     | 6.25                                     | 8.43 $\pm$ 9.23   | 0.03 $\pm$ 0.02 |
|                                                                     | 3.13                                     | 13.50 $\pm$ 9.01  | 0.04 $\pm$ 0.03 |

32

33
